# Supplementary material
Source: PubMed Central journal article supplement (PMC3873151)
Supplement: NIHMS525723-supplement-1.pdf [file NIHMS525723-supplement-1.pdf]

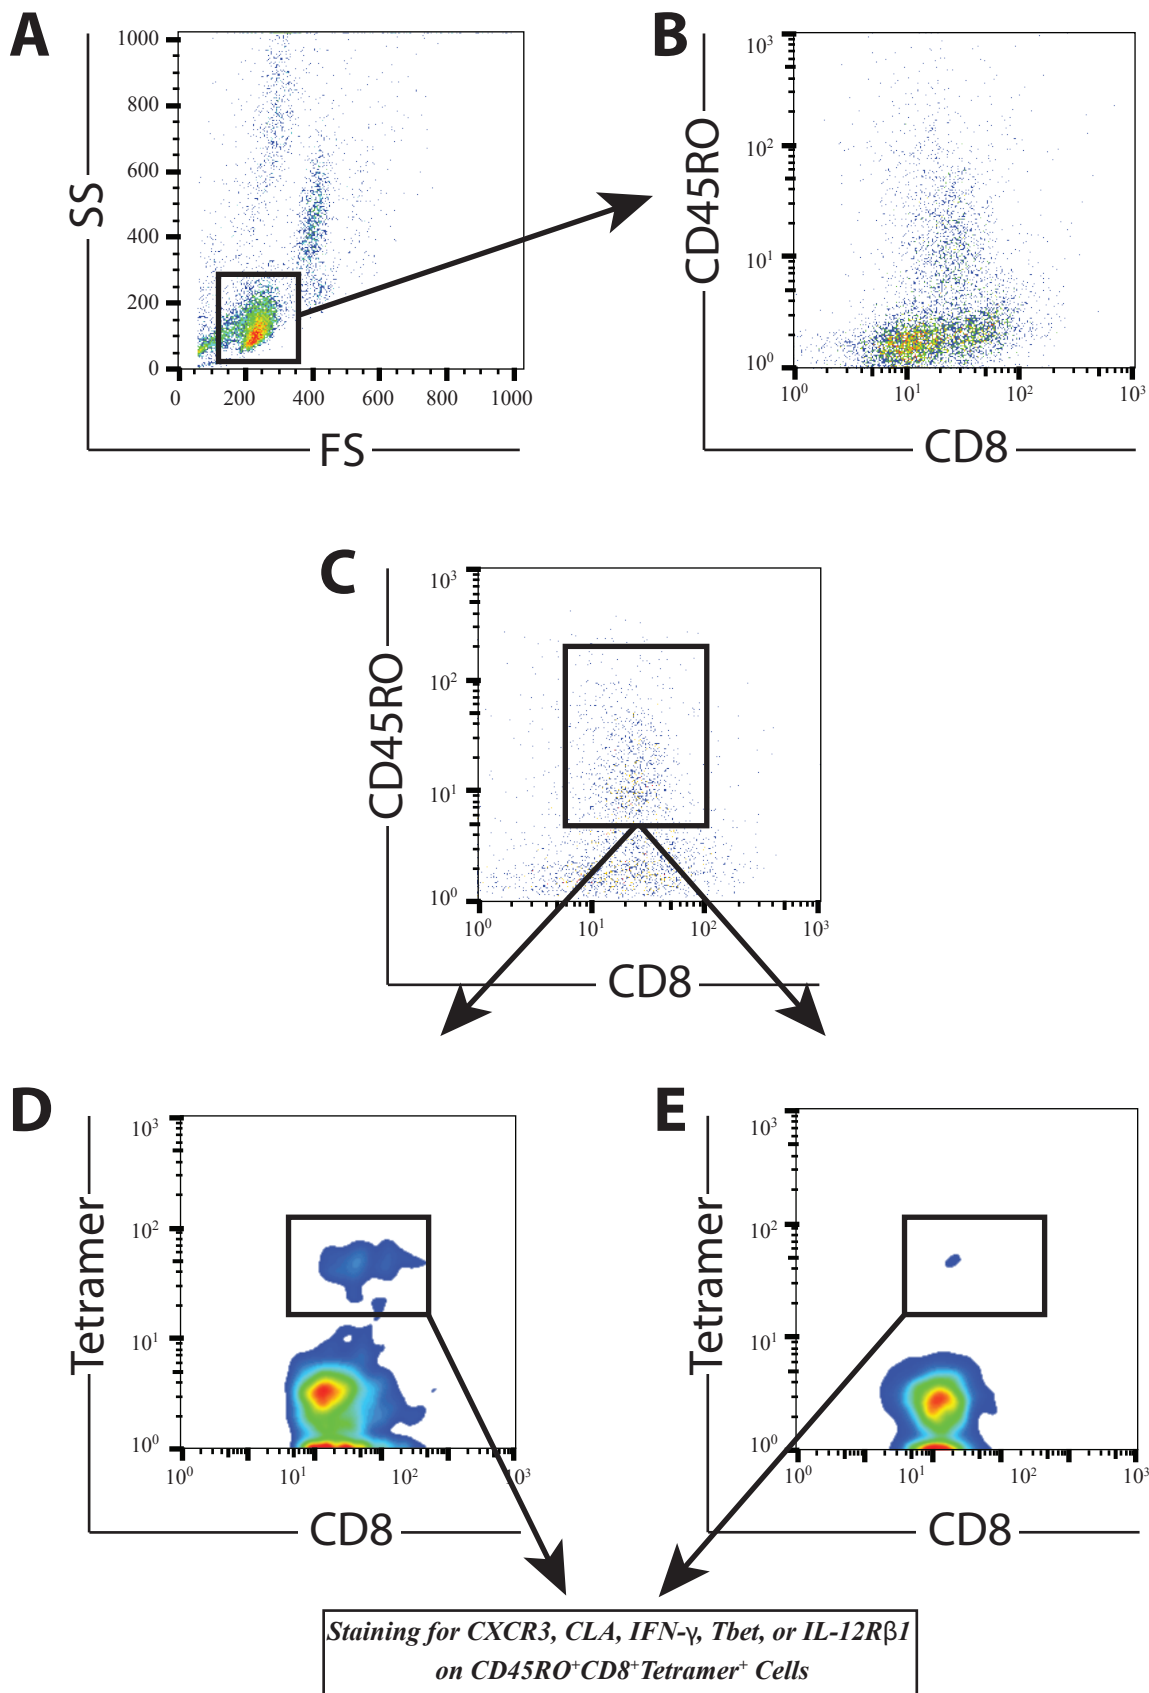

**Supplemental Fig. 1. Gating strategy.** Representative flow cytometry to illustrate the gating strategy for evaluation of patient-derived PBMCs. A) Forward scatter (FS) and side scatter (SS) profile of PBMC, showing lymphocyte gate (verified by backgating on CD8 cells). B) CD8/CD45RO profile in lymphocyte gate of pre-selection cells. C) CD8/CD45RO profile of post-selection cells. D) CD8/pooled tetramer profile of post-selection cells from vaccinated patient; in vaccinated patients, tetramer<sup>+</sup> cells were observed at 0.02 - 1.84% of the CD45RO<sup>+</sup>CD8<sup>+</sup> subset. E) CD8/pooled tetramer profile of post-selection cells from a normal donor. In normal donor samples, tetramer<sup>+</sup> cells were observed at <0.01% of the CD45RO<sup>+</sup>CD8<sup>+</sup> subset.
