# Supplementary material
Source: PubMed Central journal article supplement (PMC3873151)
Supplement: NIHMS525723-supplement-2.pdf [file NIHMS525723-supplement-2.pdf]

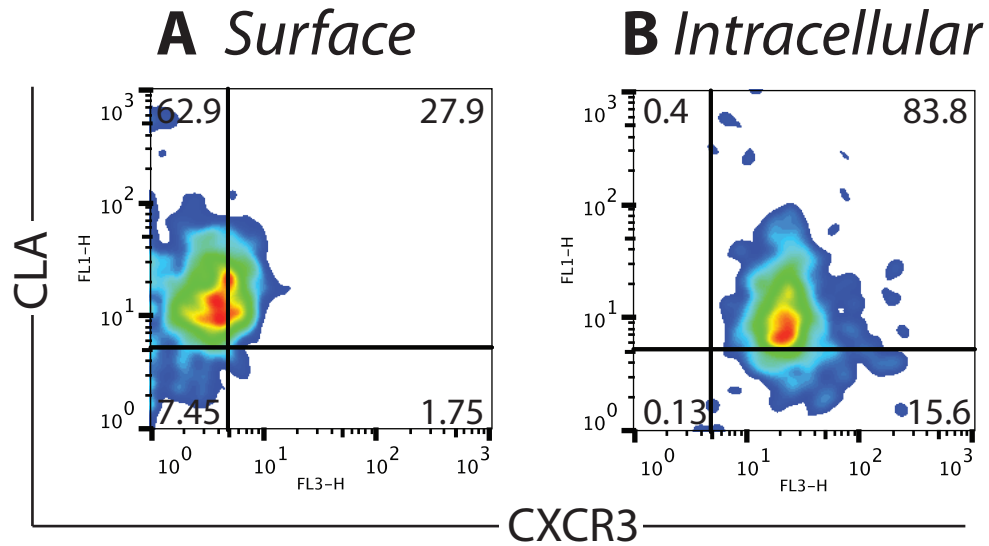

**Supplemental Fig. 2. Representative CXCR3 staining.** Representative flow cytometry for surface CXCR3 (Panel A) and Intracellular CXCR3 (Panel B) in matched samples. Populations are gated on CD8<sup>+</sup> CD45RO<sup>+</sup> tetramer<sup>+</sup> cells.
