# Supplementary material
Source: PubMed Central journal article supplement (PMC3873151)
Supplement: NIHMS525723-supplement-3.pdf [file NIHMS525723-supplement-3.pdf]

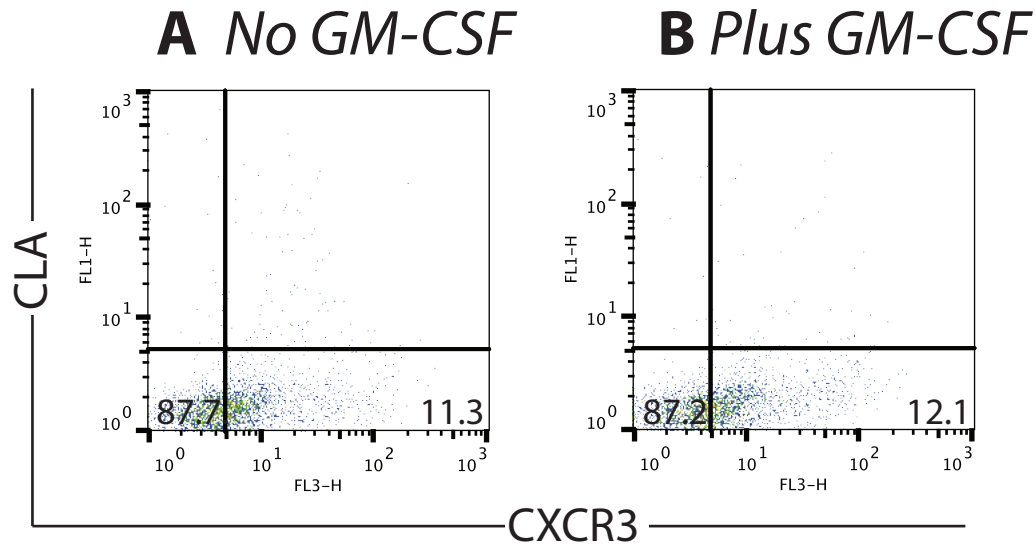

**Supplemental Fig. 3. Representative CXCR3 and CLA staining in CD8<sup>+</sup> CD45RO<sup>+</sup> tetramer-negative cell populations.** Representative flow cytometry from patient vaccinated without GM-CSF (Panel A; matched to Fig. 1 Panel A) or with GM-CSF (Panel B; matched to Fig.1 Panel C). Addition of GM-CSF had no significant ( $p > 0.05$ ) effect on CXCR3 or CLA expression in non antigen-specific CD8 populations. Representative data following a single vaccination; similar data were observed following multiple vaccinations (not shown).
